# Supplementary material for: Simple fabrication and electrochemical performance of porous and double-shelled macroporous CuO nanomaterials with a thin carbon layer
Source: Royal Society of Chemistry journal article supplement (doi:10.1039/c4ra09648g), 2014-01-01
Supplement: c4ra09648g1.pdf [file c4ra09648g1.pdf]

# Supporting Information

## Simple fabrication and electrochemical performance of porous and double-shelled macroporous CuO nanomaterials with a thin carbon layer

HyunMee Kim<sup>‡ a</sup>, Hyung-Seok Lim<sup>‡ a</sup>, Yu-Jeong Kim<sup>a</sup>, Yang-Kook Sun<sup>b</sup>  
and Kyung-Do Suh<sup>\* a</sup>

\*corresponding author

<sup>‡</sup> These authors contributed equally to this work.

<sup>a</sup> Division of Chemical Engineering, College of Engineering, Hanyang University, Seoul 133-791, Republic of Korea. E-mail: kdsuh@hanyang.ac.kr; Fax: +82-2-2220-4680; Tel: +82-2-2220-0526.

<sup>b</sup> Division of WCU Engineering, College of Engineering, Hanyang University, Seoul 133-791, Republic of Korea. E-mail: yksun@hanyang.ac.kr; Tel: +82-2-2220-1749

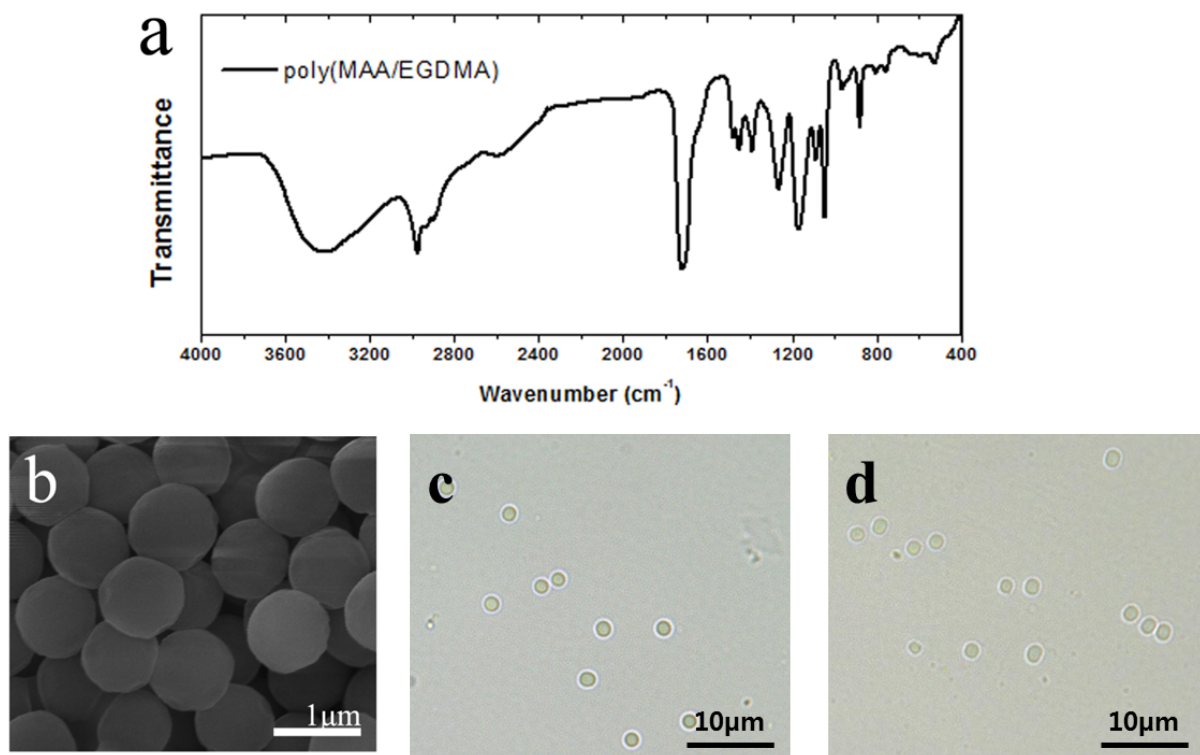

**Figure S1.** (a) FT-IR spectrum, (b) SEM image of poly(MAA/EGDMA) microspheres and OM images of poly(MAA/EGDMA) microspheres dispersed in aqueous solutions pHs of (c) 6.44 and (d) 9.05.

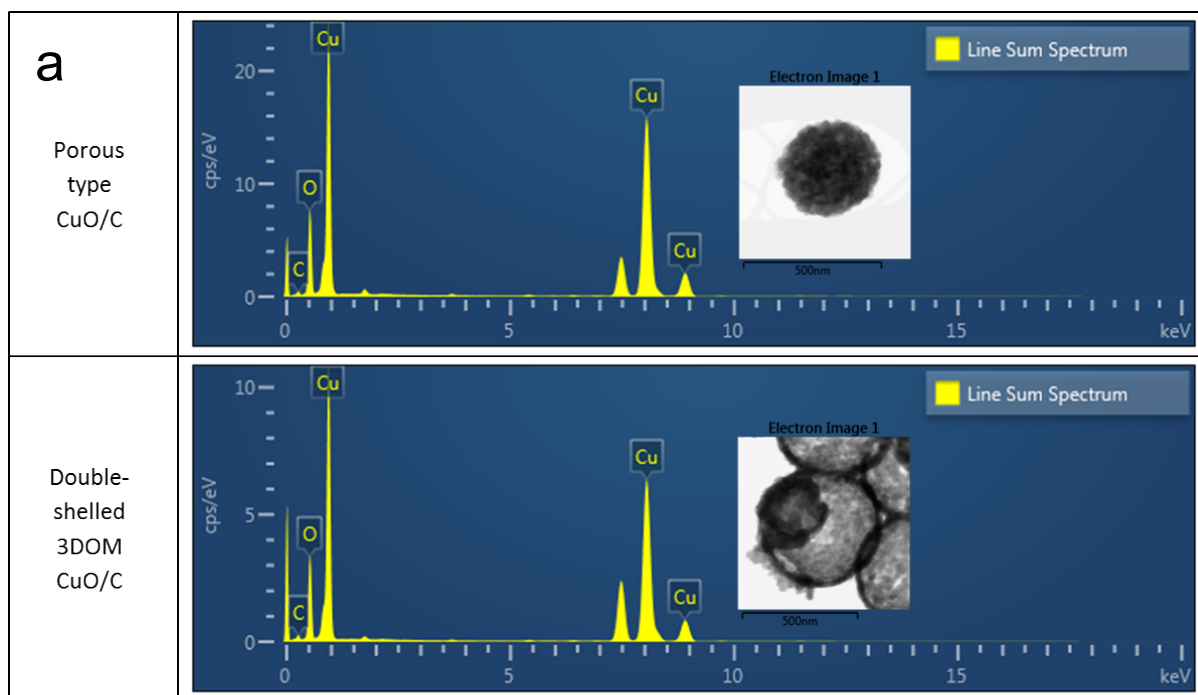

**b**

| Element | Line Type | Porous type CuO |          | Double-shelled 3DOM CuO/C |          |
|---------|-----------|-----------------|----------|---------------------------|----------|
|         |           | Wt%             | Atomic % | Wt%                       | Atomic % |
| C       | K series  | 4.57            | 10.33    | 5.50                      | 12.25    |
| O       | K series  | 38.54           | 65.37    | 38.28                     | 64.06    |
| Cu      | K series  | 56.89           | 24.30    | 56.22                     | 23.69    |
| Total   |           | 100.00          | 100.00   | 100.00                    | 100.00   |

**Figure S2.** (a) EDX profiles of porous CuO/C and double-shelled 3DOM CuO/C and (b) element contents of C, O and Cu in two types of CuO/C samples.

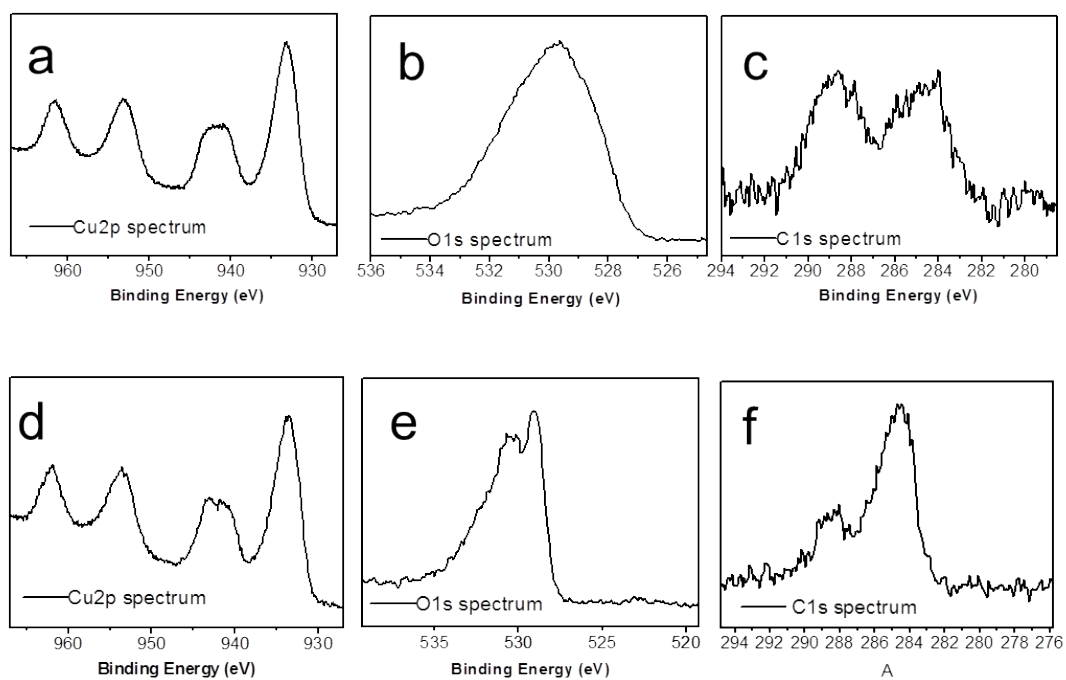

**Figure S3.** XPS spectra of (a, b and c) porous CuO/C submicron spheres and (d, e and f) double-shelled 3DOM CuO/C: (a and d) Cu2p, (b and e), O1s and (c and f) C1s.

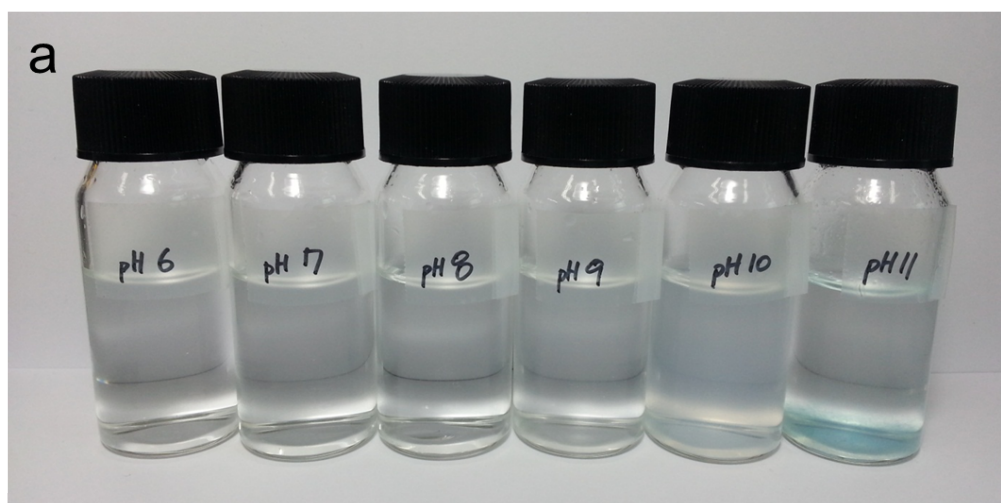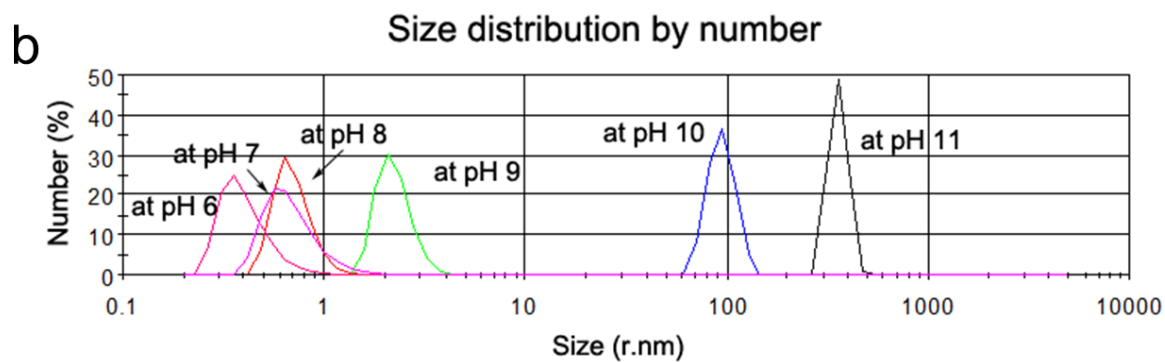

**Figure S4.** (a) Digital photograph of vials containing Cu aqueous solutions with different pHs (pH6~11) after adding  $\text{CuSO}_4$  solution. (b) Size distribution of Cu precursors formed in aqueous solutions with different pHs.

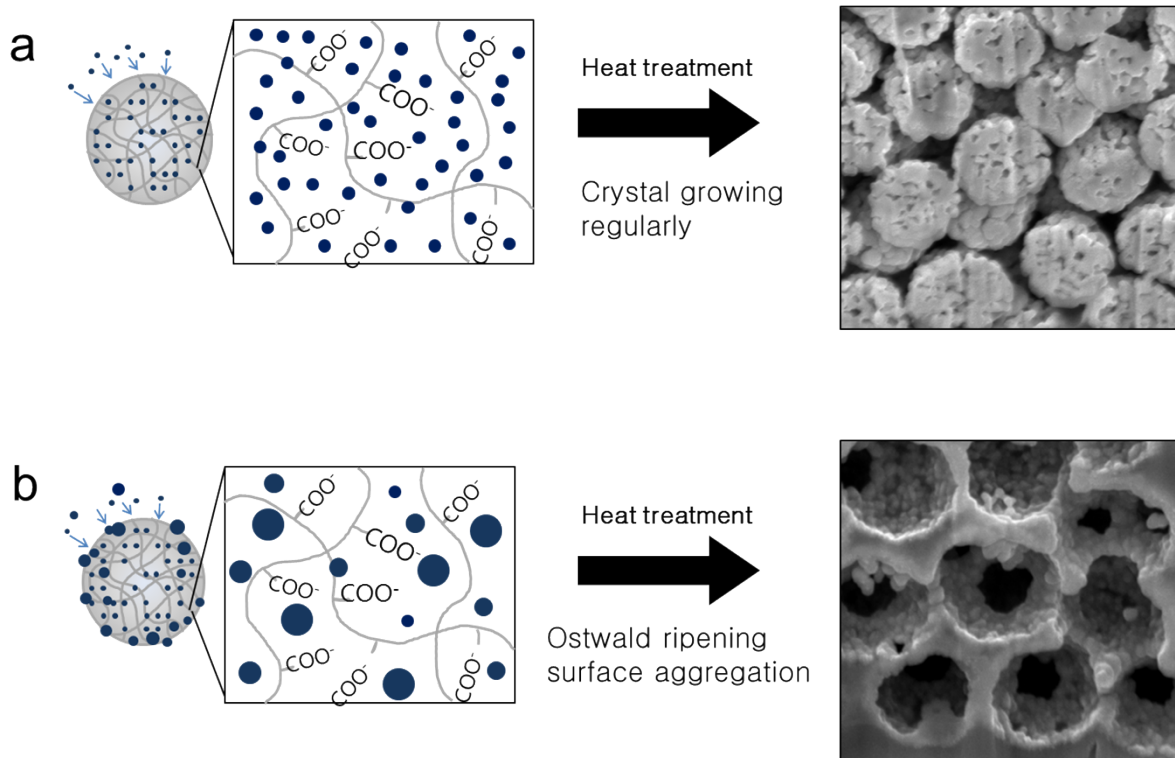

**Figure S5.** Schematic illustration of polymer networks with Cu precursors in Cu precursors/poly(MAA/EGDMA) composite microspheres prepared under different pH conditions and FIB-SEM images of (a) porous CuO/C submicron spheres and (b) macroporous 3DOM CuO/C after heat treatment.

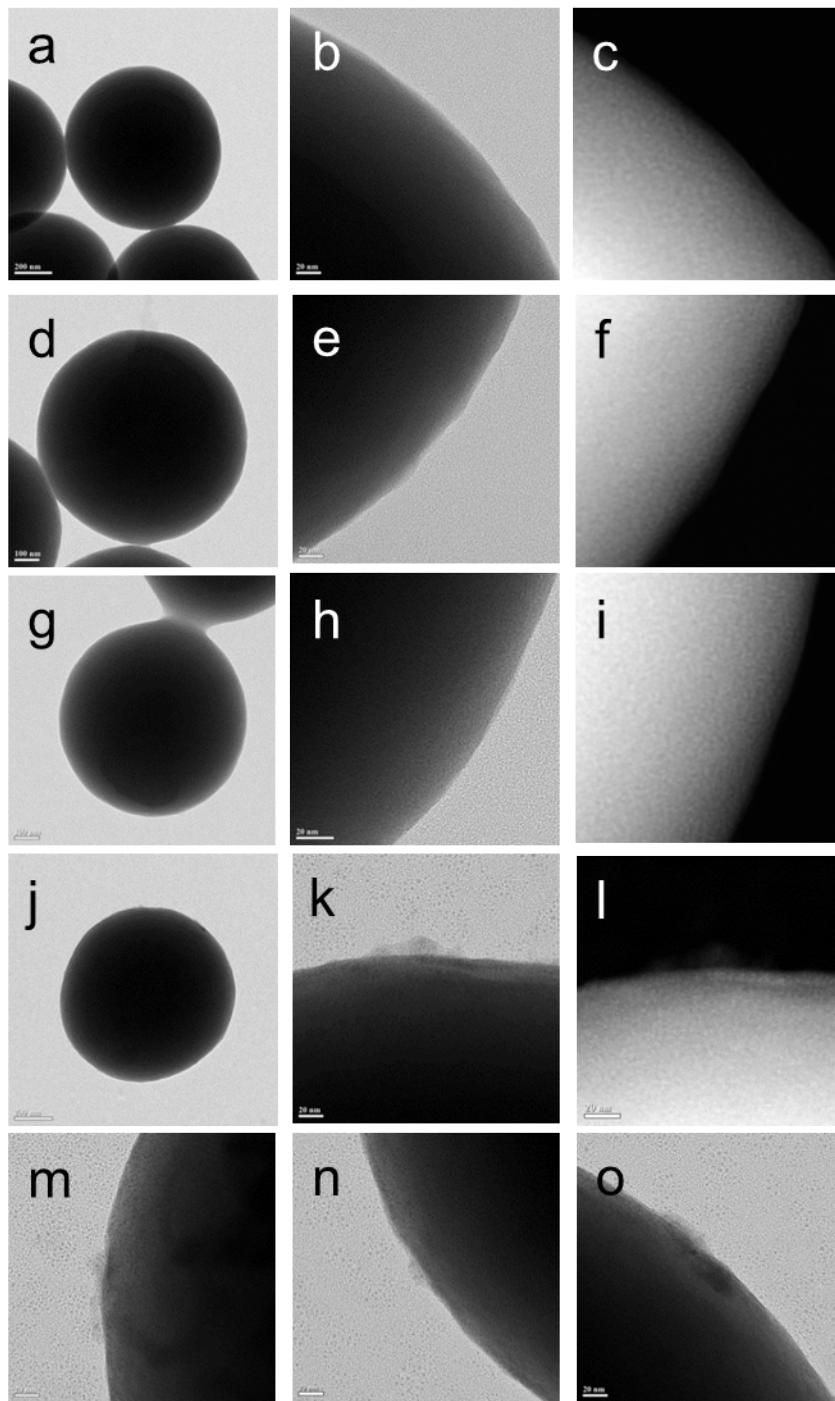

**Figure S6.** HR-TEM images at (a, d, g and j) low and (b, e, h, k, m, n and o) high magnifications and (c, f, i, and l) STEM images of Cu precursors/poly(MAA/EGDMA) composite microspheres prepared under different pH conditions: (pH 6.55: a, b and c), (pH 7.44: d, e and f), (pH 9.05: g, h and i), (pH 10.05: j, k and l) and (pH 11.21: m, n and o).

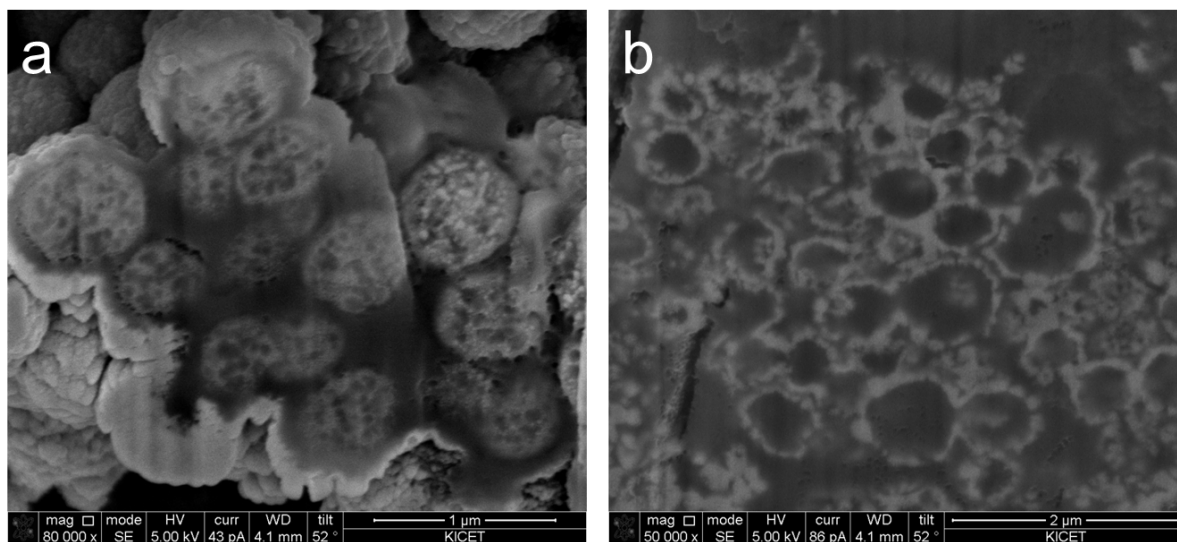

**Figure S7.** Cross-sectional(FIB-SEM) images of composite electrodes containing (a) porous Cu/O submicron spheres and (b) double-shelled 3DOM CuO/C after 100 cycles.



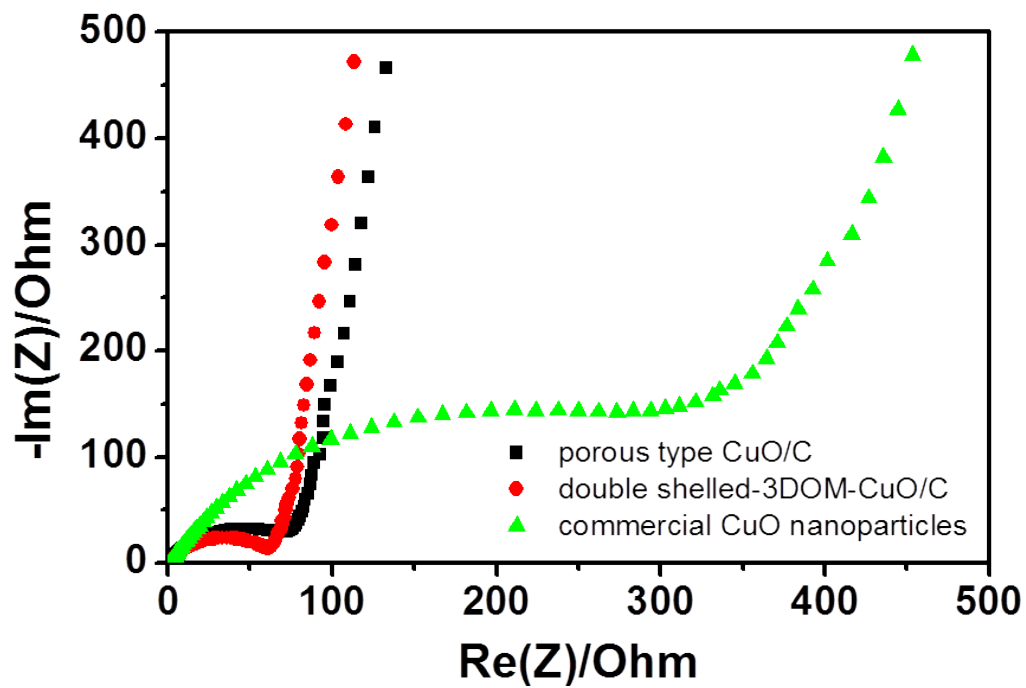

**Figure S8.** Electrochemical impedance spectroscopy (EIS) of the fresh cells containing (black square) porous CuO/C submicron spheres, (red circle) double-shelled 3DOM-CuO/C and (green triangle) commercial CuO nanoparticles.
